# Supplementary material for: The Effects of Exenatide Once Weekly (EXQW) and Exenatide Twice a Day (EXBID) on Beta-Cell Function in Type 2 Diabetes: A Systematic Review and Network Meta-Analysis
Source: Hindawi journal article supplement (doi:10.1155/2019/8083417), 2019-10-28
Supplement: f1 [file 8083417.f1.pdf]

Supplemental material

Table S1: Results of a random-effects model of HOMA-B

| Intervention           | Coef. | SD   | z     | P> z  | [95% CI]     |
|------------------------|-------|------|-------|-------|--------------|
| EXBID                  | -0.46 | 0.91 | -5.07 | 0.001 | -0.64, -0.28 |
| Glibenclamide<br>2.5mg | -0.51 | 0.32 | -1.55 | 0.121 | -1.14, 0.13  |

|                   |       |      |       |       |              |
|-------------------|-------|------|-------|-------|--------------|
| insulin           | -0.27 | 0.09 | -2.81 | 0.005 | -0.45, -0.08 |
| MET               | -0.39 | 0.12 | -3.38 | 0.001 | -0.62, -0.16 |
| PIO               | -0.48 | 0.10 | -4.85 | 0.001 | -0.68, -0.29 |
| SITA              | -0.49 | 0.12 | -4.01 | 0.001 | -0.73, -0.25 |
| placebo           | -0.45 | 0.31 | -1.45 | 0.147 | -1.06, 0.16  |
| Semaglutide<br>QW | 0.11  | 0.11 | 1.03  | 0.303 | -0.10, 0.32  |

434

435 **Table S2: Results of a random-effects model of FBG**

| Intervention           | Coef. | SD   | z     | P> z  | [95% CI]    |
|------------------------|-------|------|-------|-------|-------------|
| EXBID                  | 0.20  | 0.46 | 0.44  | 0.658 | -0.70, 1.10 |
| Glibenclamide<br>2.5mg | -0.07 | 0.75 | -0.09 | 0.925 | -1.54, 1.40 |
| insulin                | -0.02 | 0.49 | -0.04 | 0.968 | -0.97, 0.93 |
| MET                    | 0.34  | 0.61 | 0.56  | 0.574 | -0.85, 1.54 |
| PIO                    | -0.21 | 0.50 | -0.42 | 0.675 | -1.19, 0.77 |
| SITA                   | 1.23  | 0.63 | 1.96  | 0.050 | 0.002, 2.48 |
| placebo                | 0.71  | 0.79 | 0.91  | 0.365 | -0.83, 2.26 |
| Semaglutide<br>QW      | -0.80 | 0.66 | -1.22 | 0.222 | -2.08, 0.48 |

436

437 **Table S3: Results of a random-effects model of HbA1c**

| Intervention           | Coef. | SD   | z     | P> z  | [95% CI]     |
|------------------------|-------|------|-------|-------|--------------|
| EXBID                  | 0.12  | 0.18 | 0.66  | 0.511 | -0.25, 0.48  |
| Glibenclamide<br>2.5mg | -0.08 | 0.32 | -0.24 | 0.808 | -0.71, 0.55  |
| insulin                | 0.14  | 0.18 | 0.74  | 0.457 | -0.22, 0.49  |
| MET                    | 0.18  | 0.24 | 0.74  | 0.460 | -0.29, 0.65  |
| PIO                    | 0.16  | 0.19 | 0.83  | 0.407 | -0.22, 0.54  |
| SITA                   | 0.51  | 0.24 | 2.09  | 0.037 | 0.03, 0.99   |
| placebo                | 0.52  | 0.31 | 1.66  | 0.097 | -0.09, 1.13  |
| Semaglutide<br>QW      | -0.60 | 0.25 | -2.40 | 0.016 | -1.09, -0.11 |

438

439 **Table S4: Results of a random-effects model of weight loss**

| Intervention           | Coef. | SD   | z     | P> z  | [95% CI]     |
|------------------------|-------|------|-------|-------|--------------|
| EXBID                  | -0.73 | 0.20 | -3.56 | 0.001 | -1.13, -0.33 |
| Glibenclamide<br>2.5mg | 4.47  | 1.58 | 2.84  | 0.005 | 1.38, 7.57   |
| insulin                | 3.99  | 0.24 | 16.95 | 0.001 | 3.53, 4.45   |
| MET                    | -0.07 | 0.28 | -0.25 | 0.799 | -0.61, 0.47  |
| PIO                    | 3.27  | 0.29 | 11.25 | 0.001 | 2.70, 3.84   |
| SITA                   | 1.13  | 0.35 | 3.19  | 0.001 | 0.44, 1.82   |
| placebo                | 1.27  | 1.46 | 0.87  | 0.382 | -1.58, 4.13  |

|             |       |      |       |       |              |
|-------------|-------|------|-------|-------|--------------|
| Semaglutide | -3.70 | 0.41 | -9.02 | 0.001 | -4.50, -2.90 |
| QW          |       |      |       |       |              |

**Figure S1: Evidence structure of eligible comparisons for network meta-analysis of the secondary outcomes (FBG, HbA1c, Weight loss)**

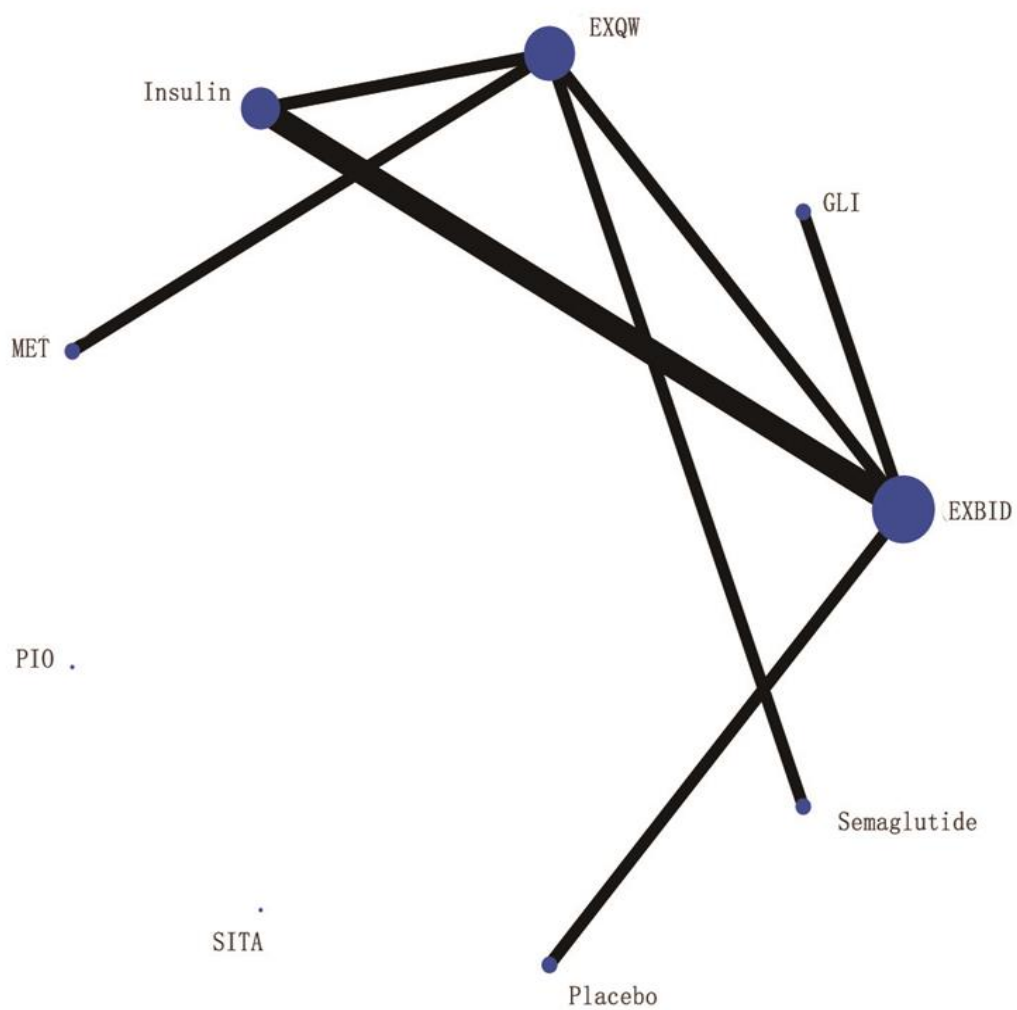

445

A: FBG

446

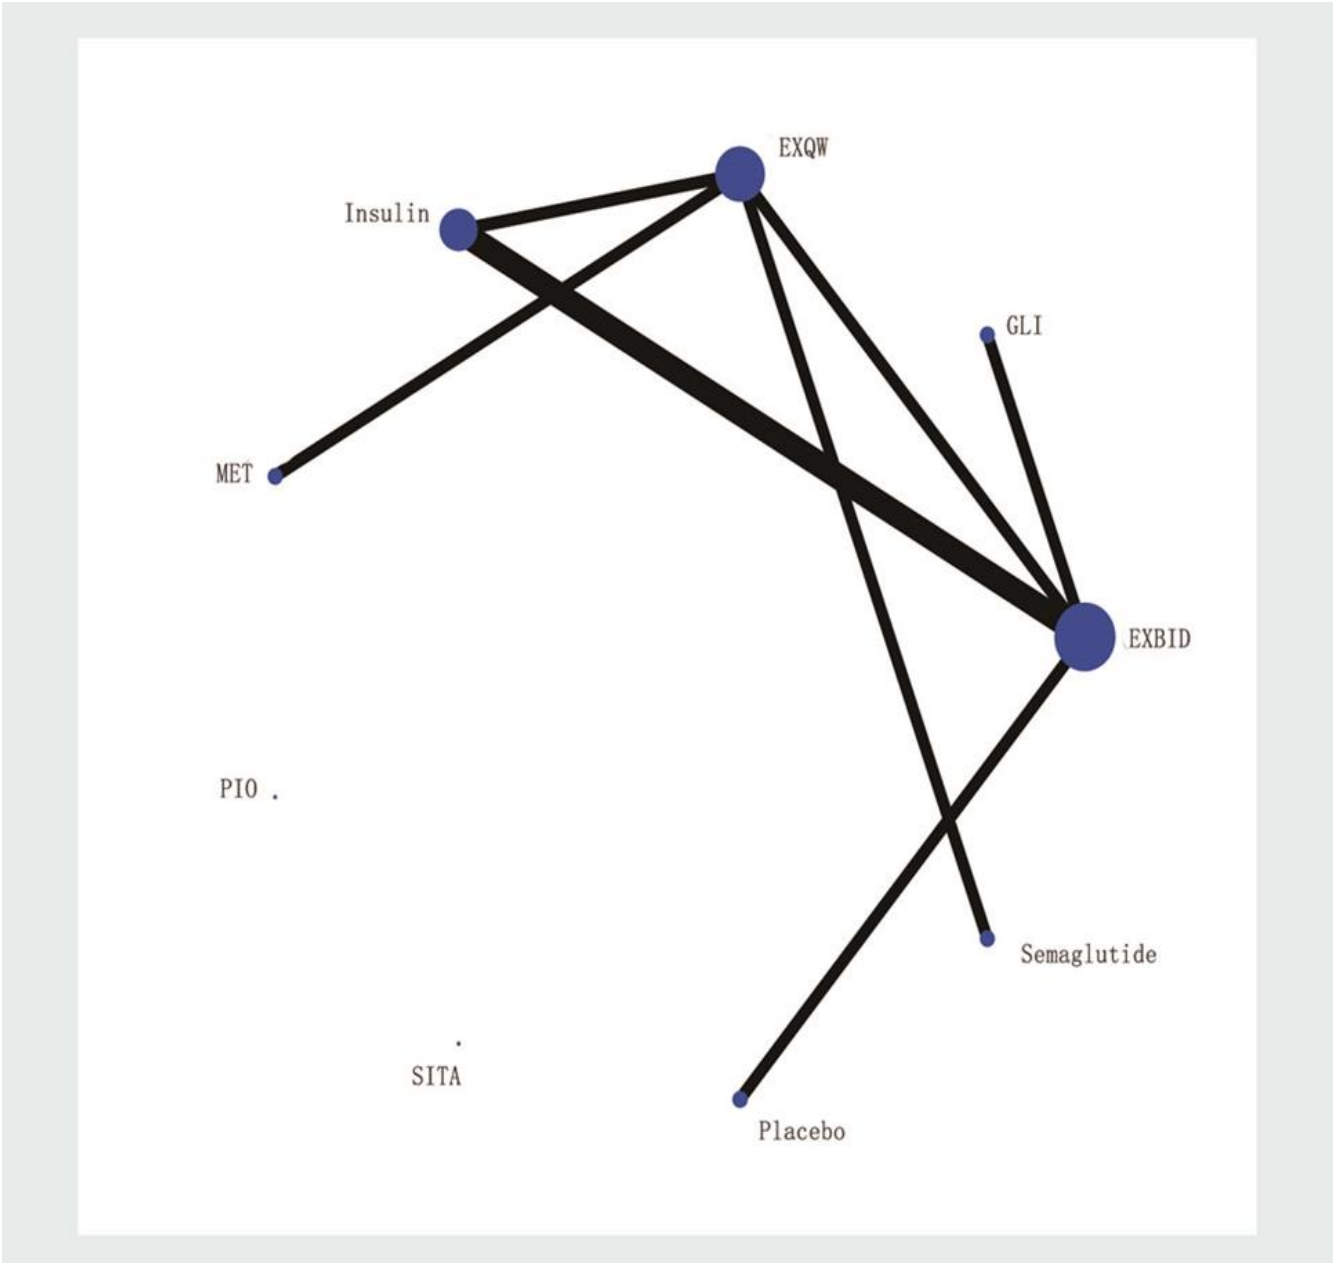

447

B: HbA1c

448

449

450

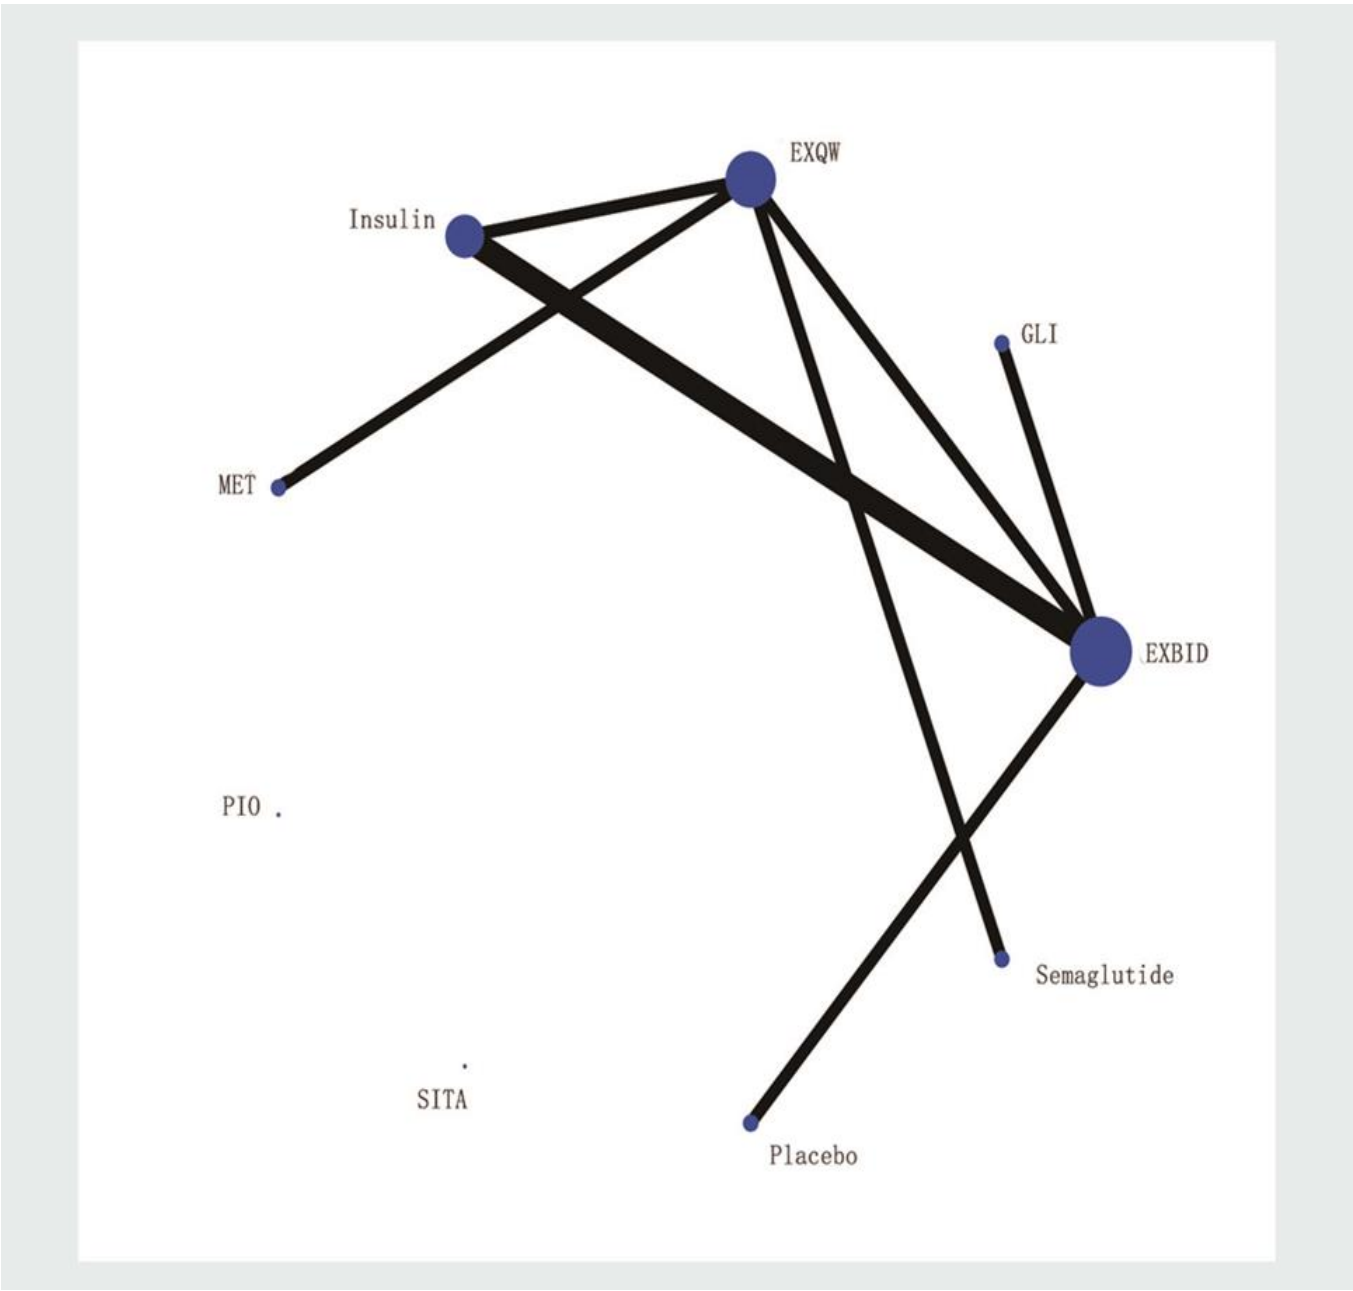

**Figure S2: Results of network meta-analysis of the secondary outcomes**

**(FBG, HbA1c, Weight loss).**

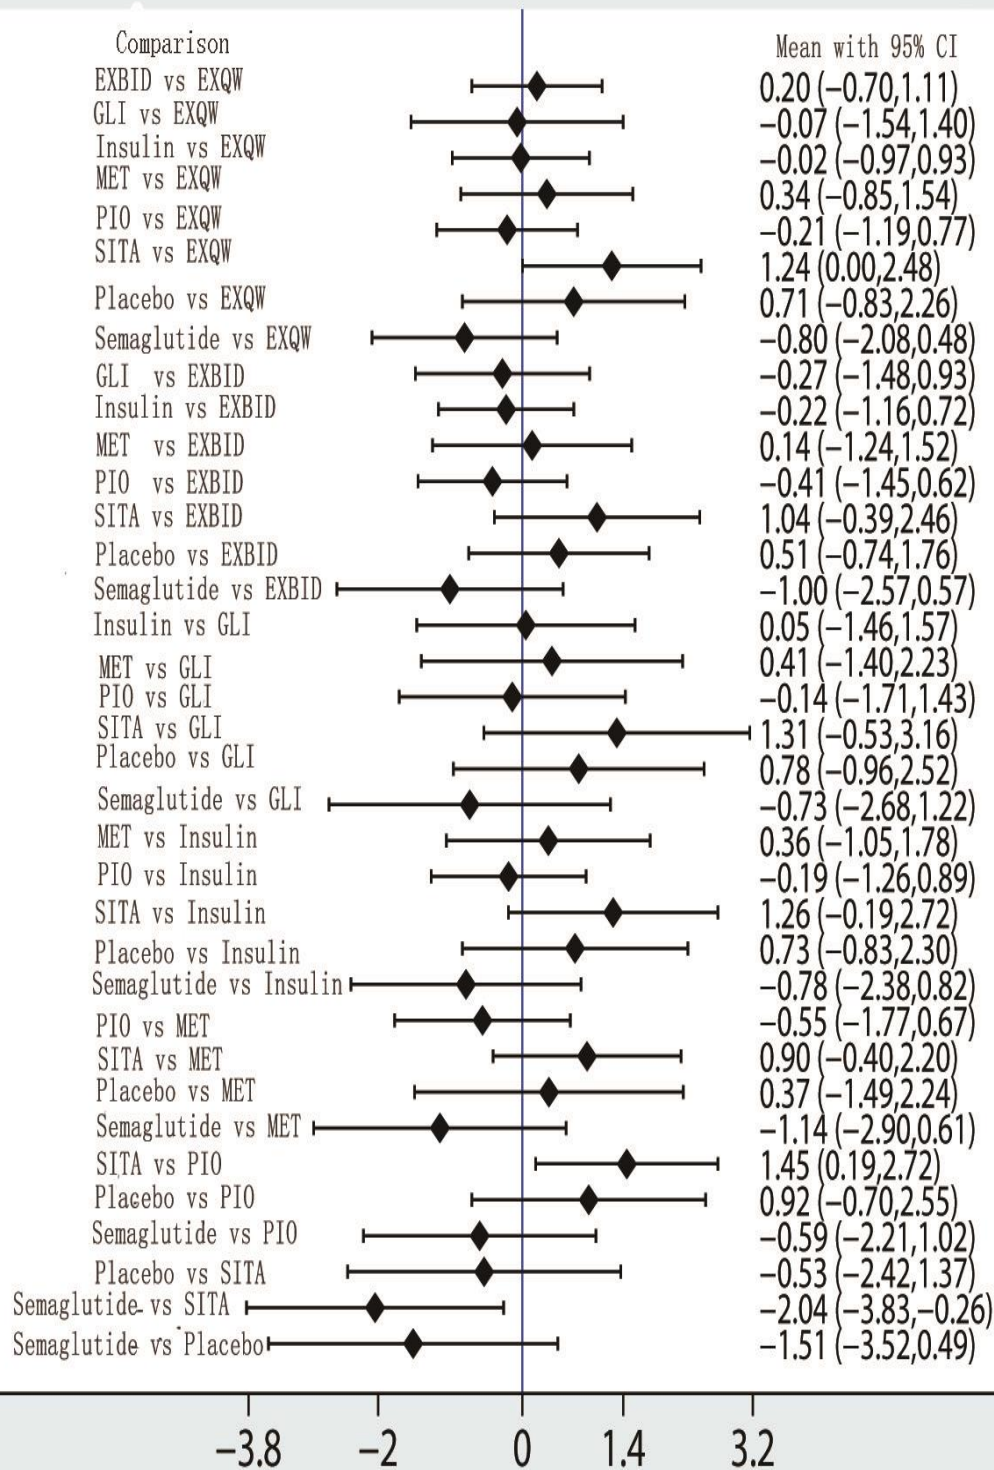

**A: FBG**

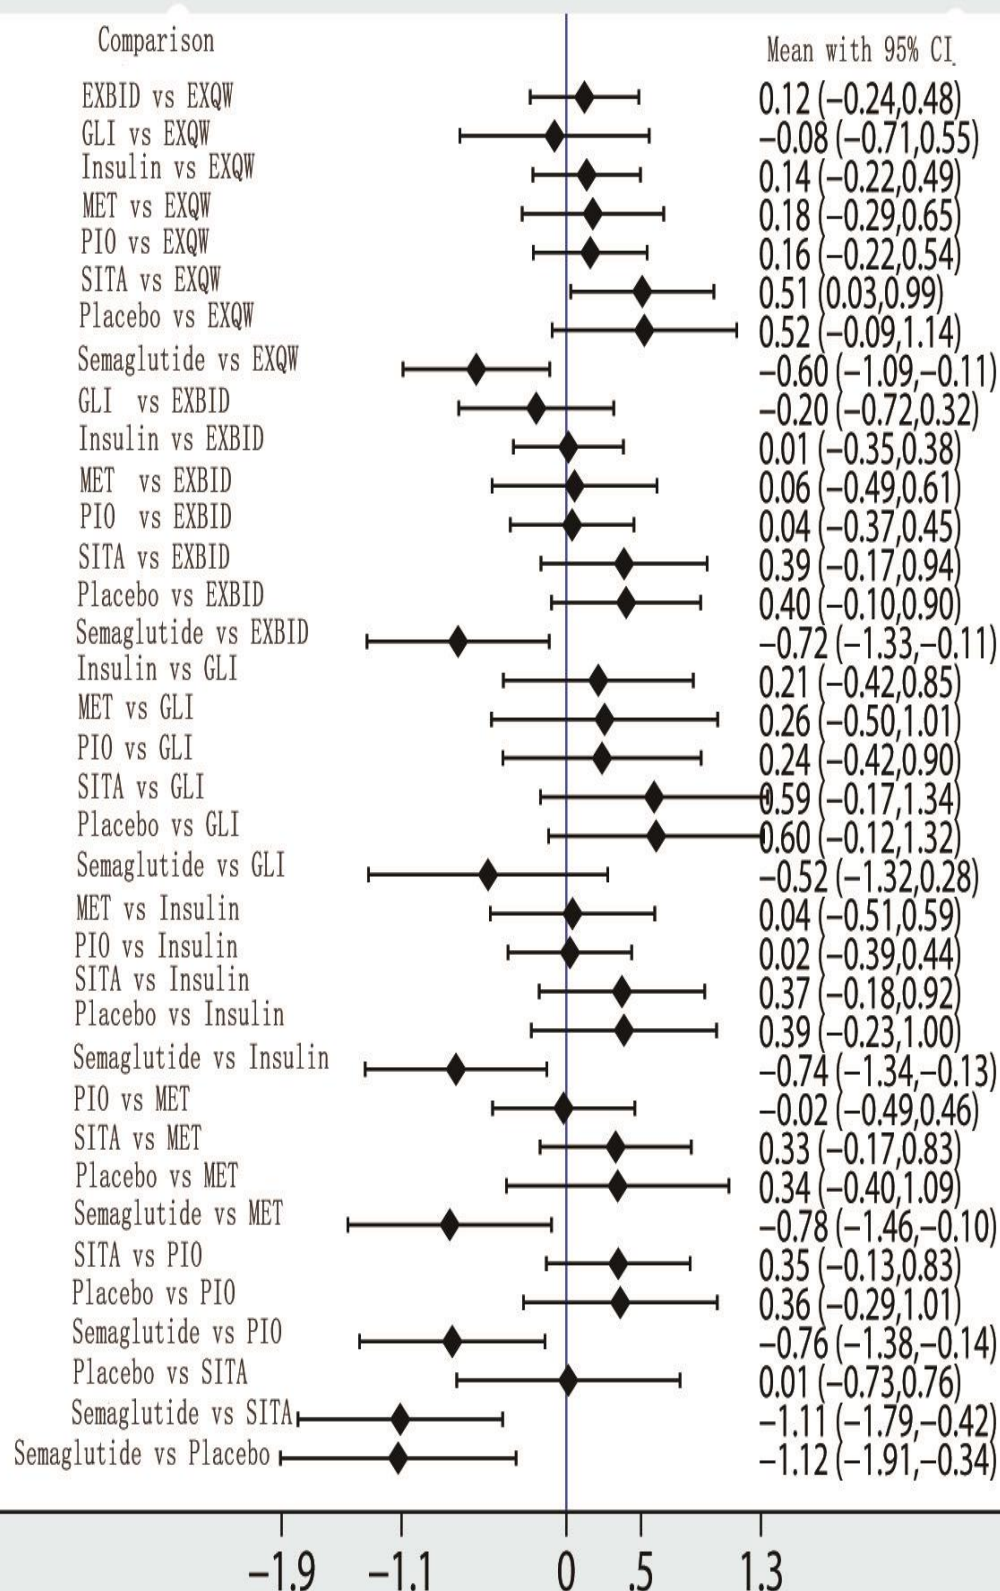



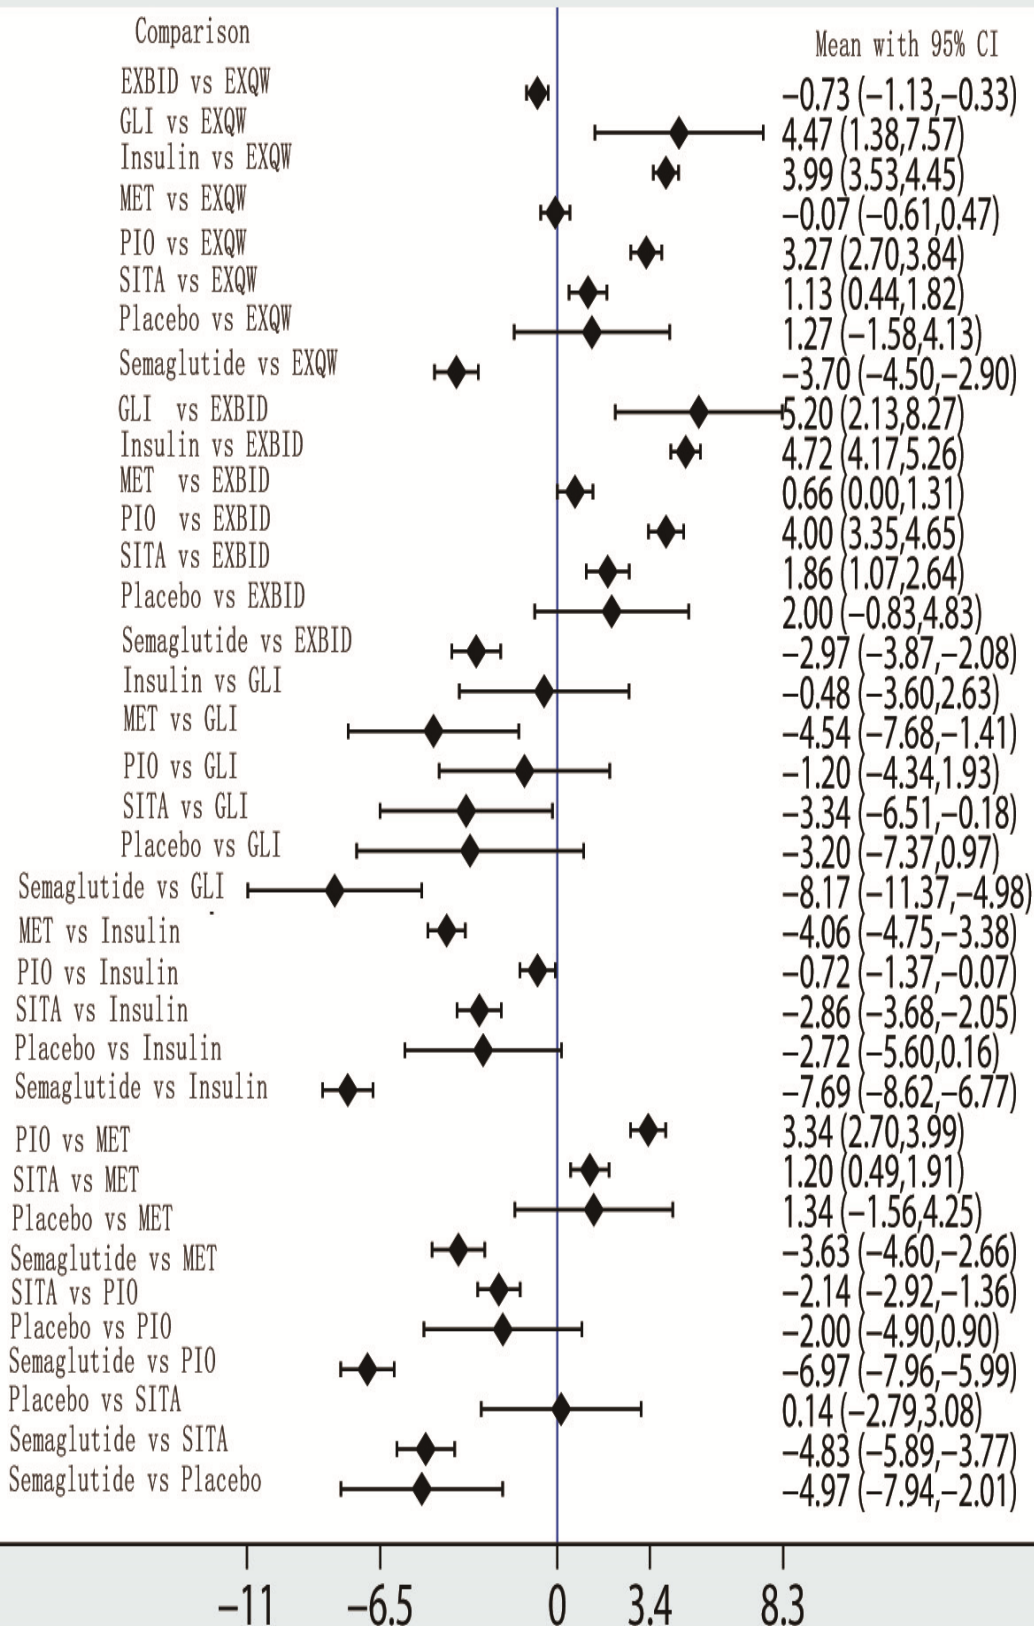

Figure S3: Comparison-adjusted funnel plots of the secondary outcomes

(FBG, HbA1c, Weight loss)

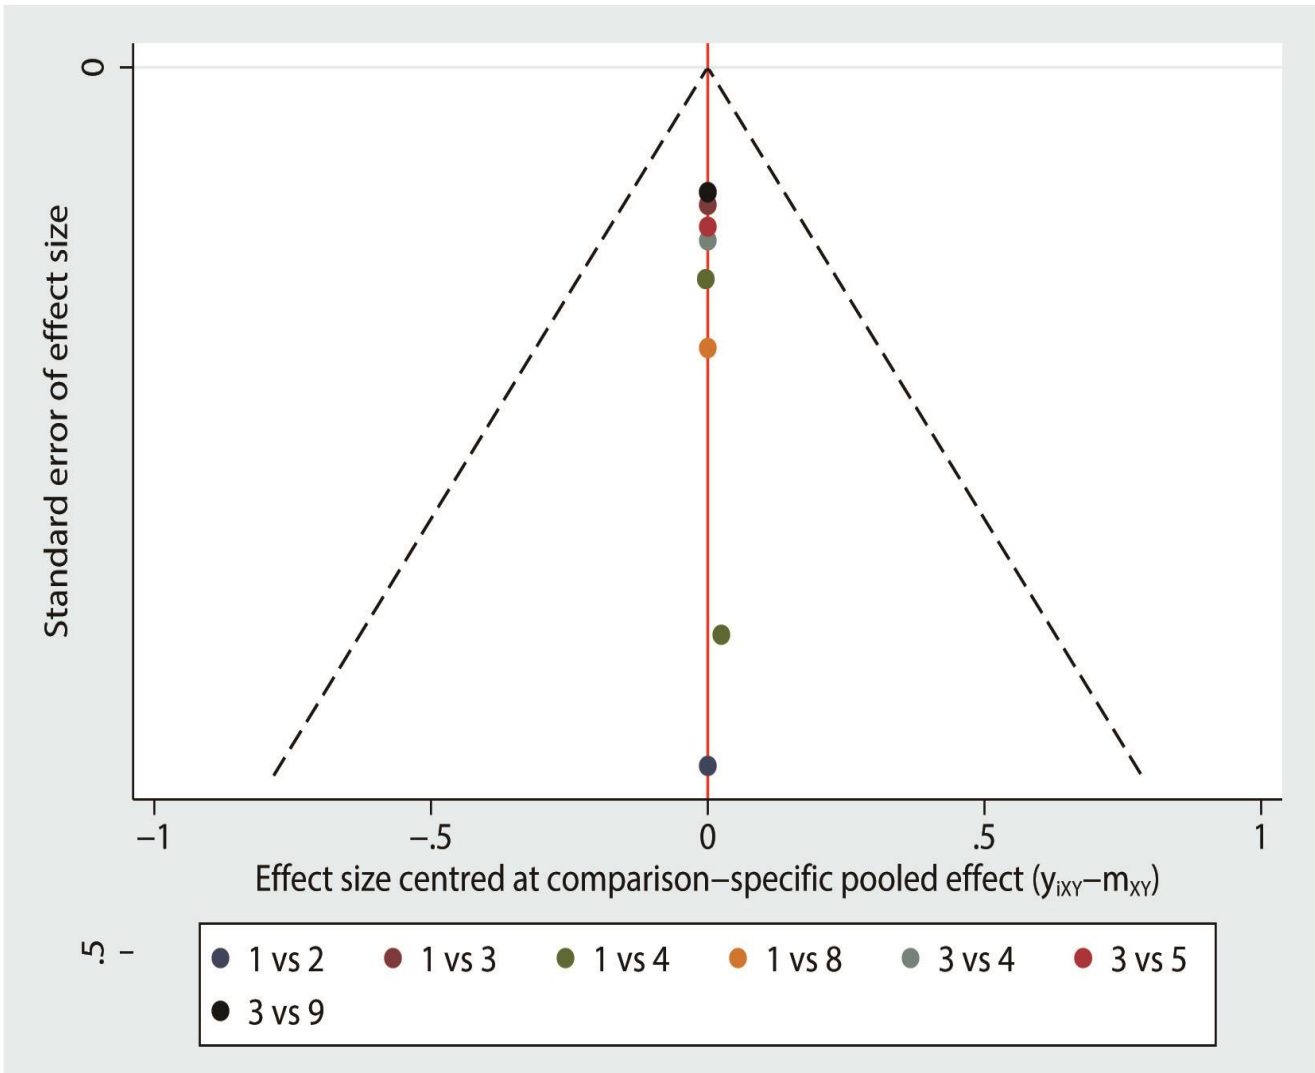

A: FBG

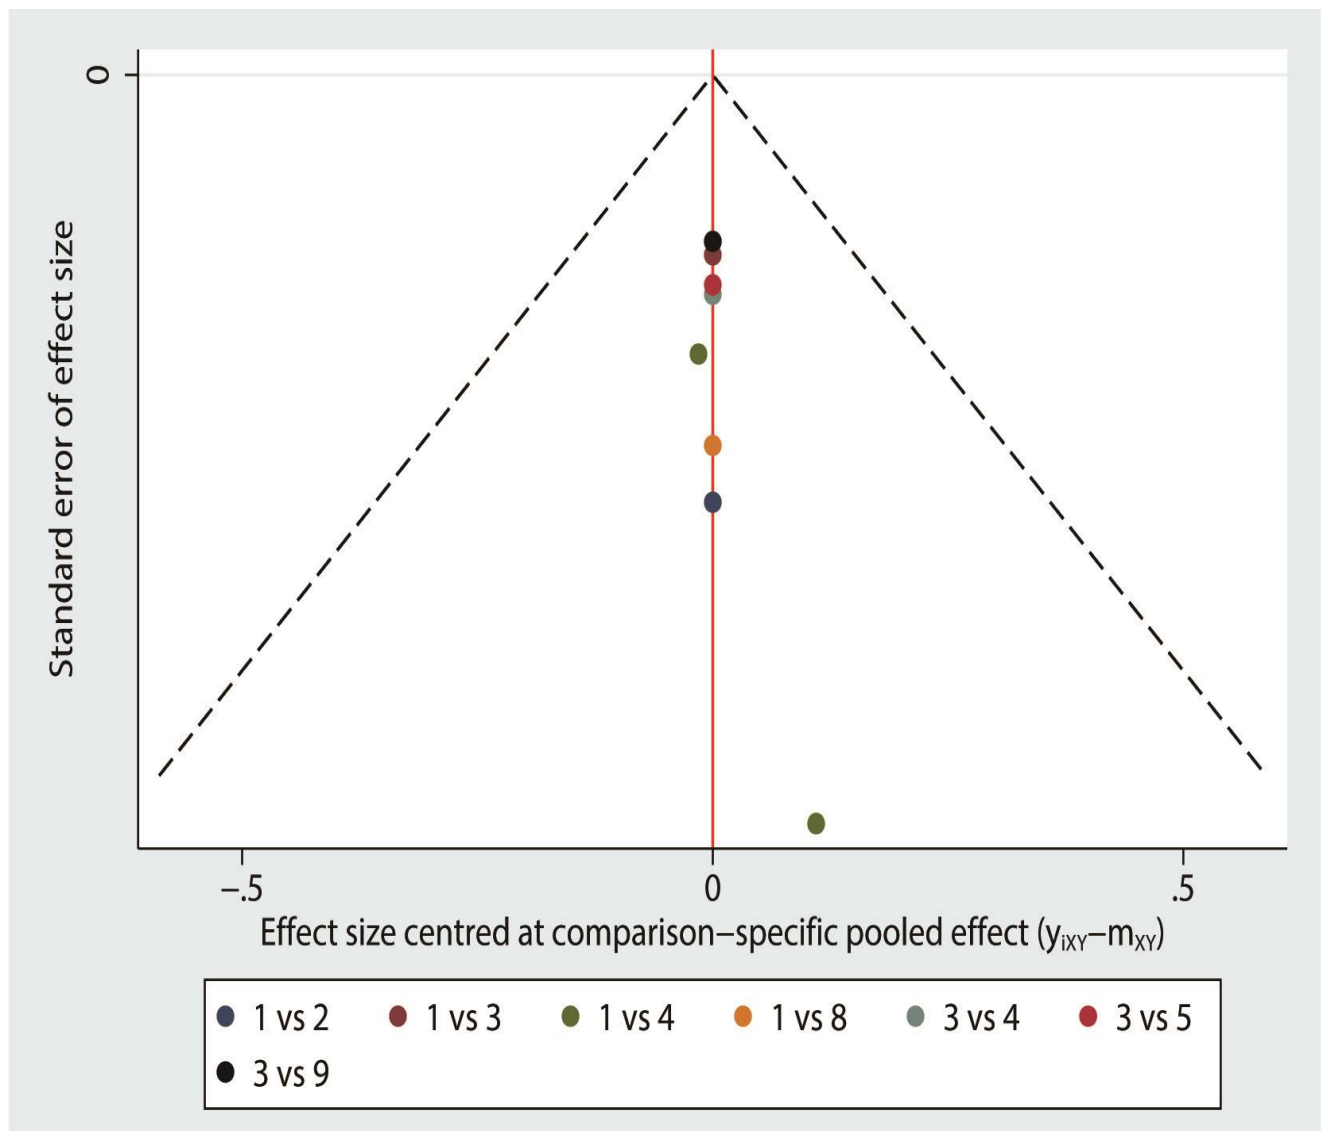

B: HbA1c

468

469

470

471

472

473

474

475

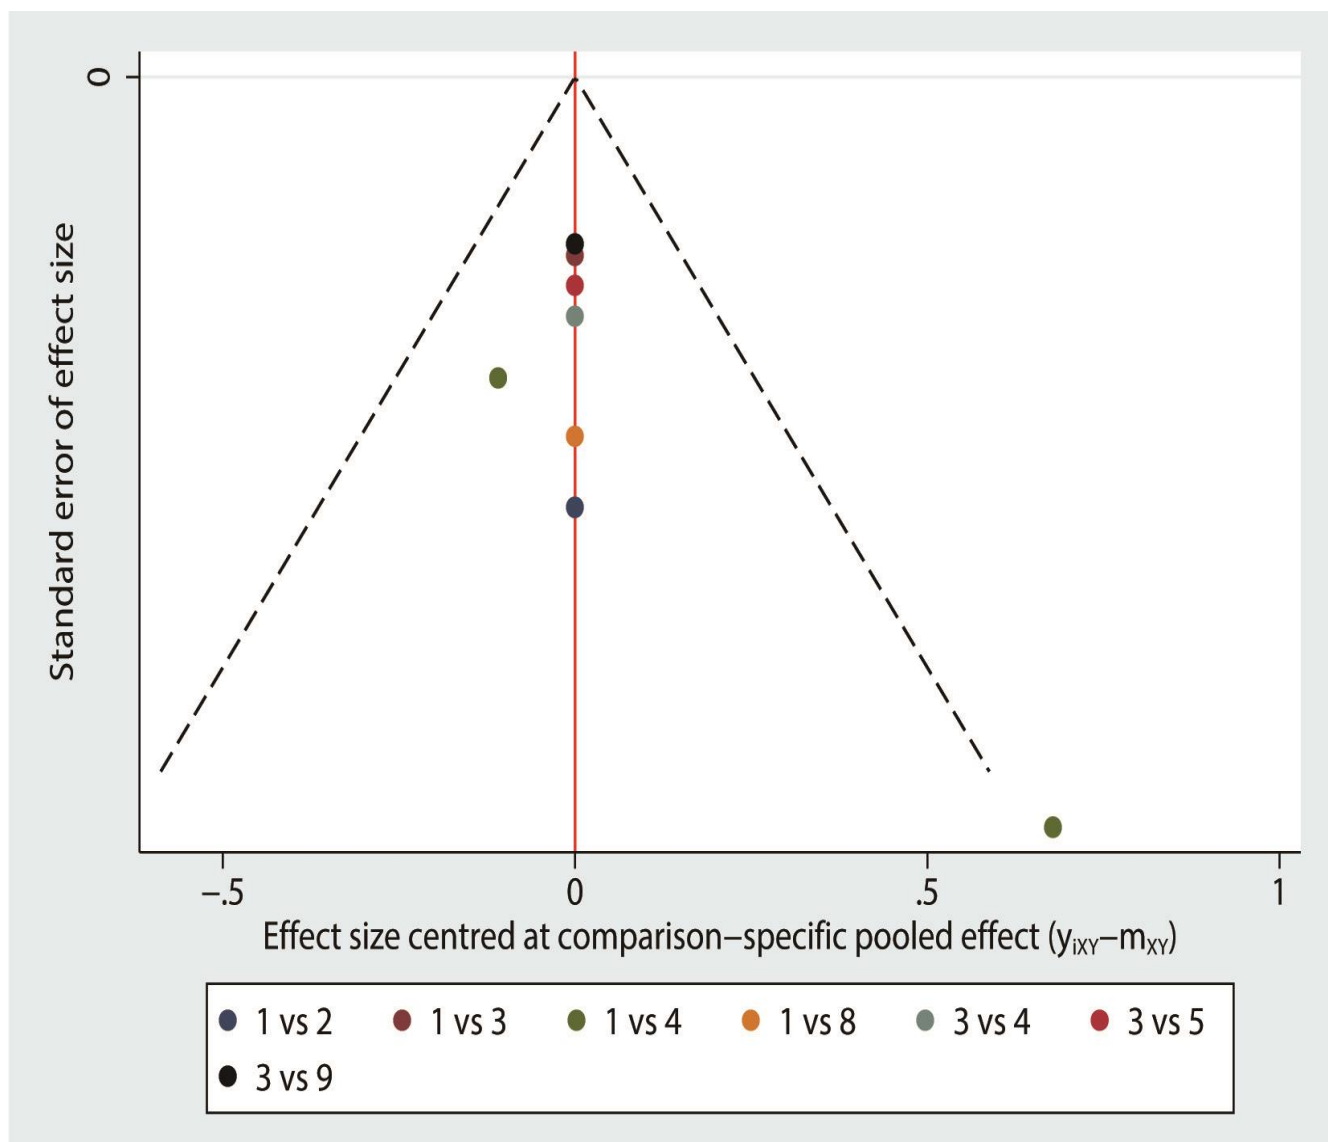

476

C: Weight loss

477

478

479

480

481

482

483

Figure S4: Plots of cumulative ranking probability of the secondary outcomes (FBG, HbA1c, Weight loss)

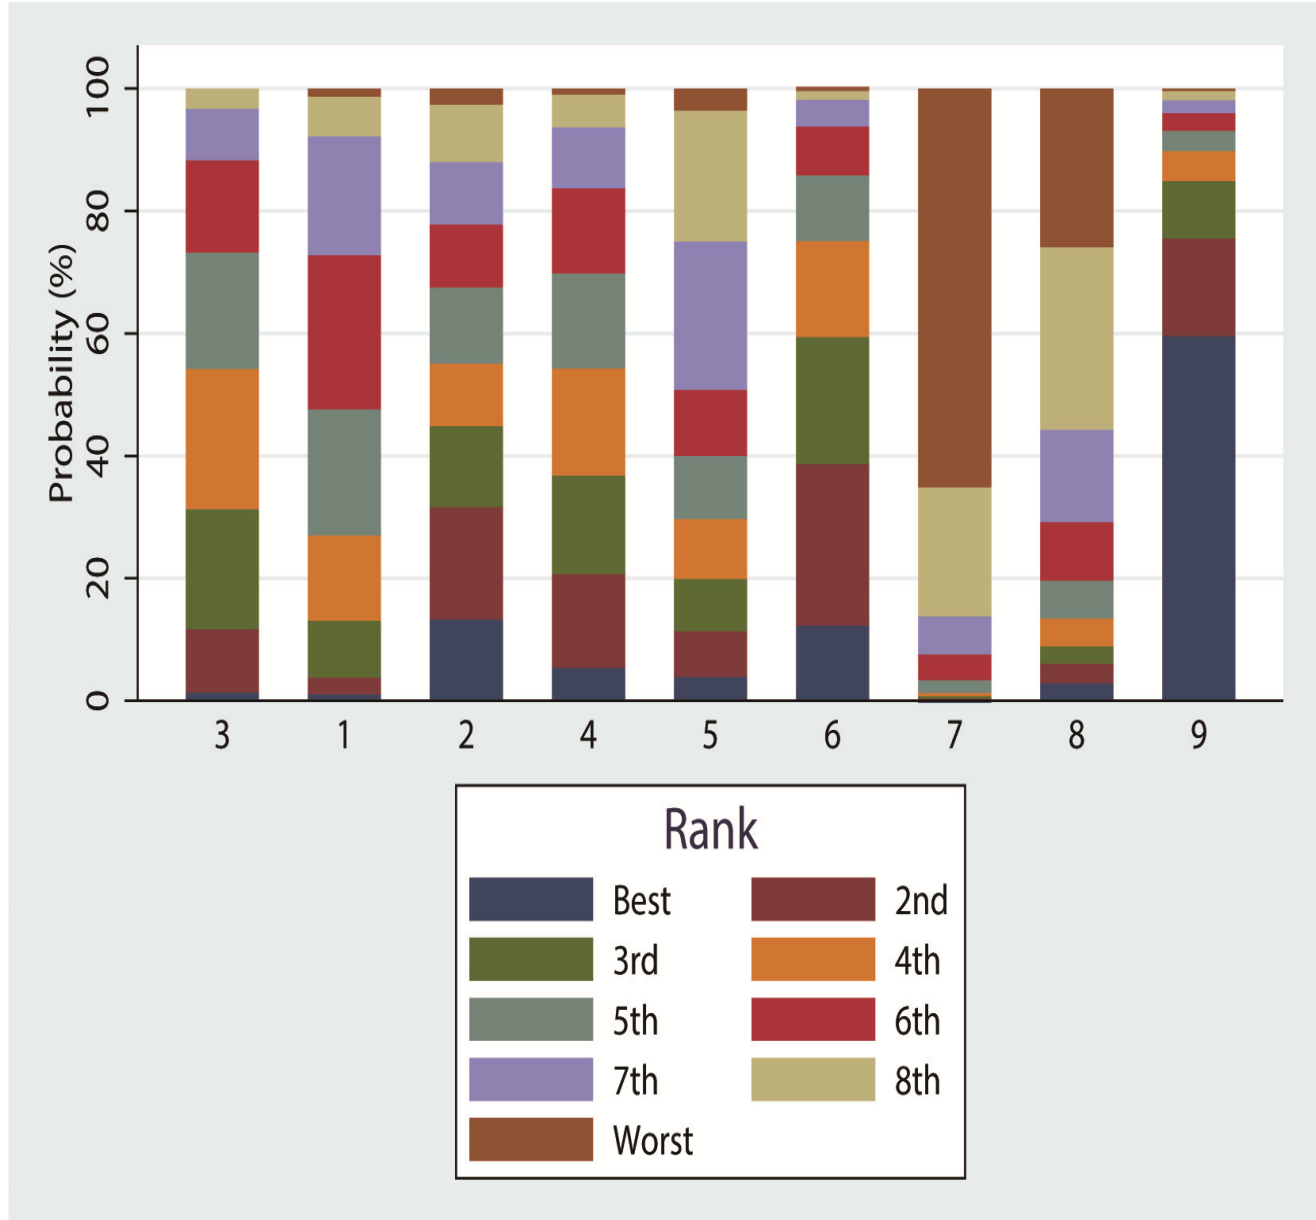

A: FBG

491

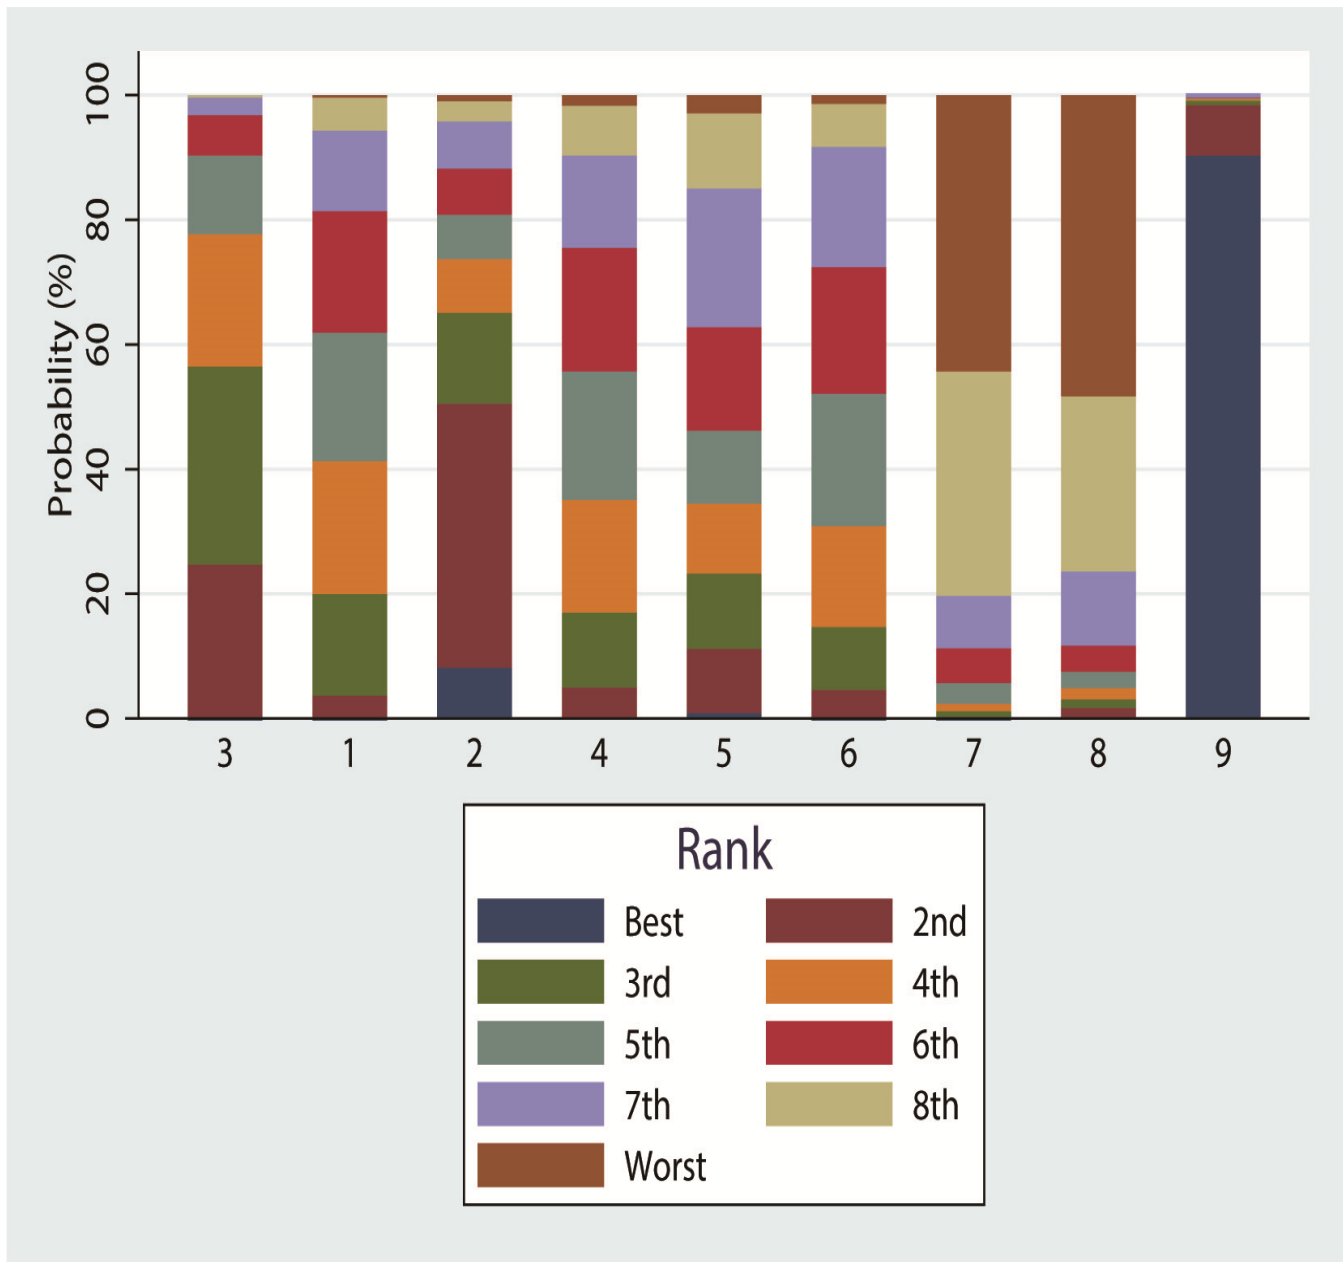

492

B: HbA1c

493

494

495

496

497

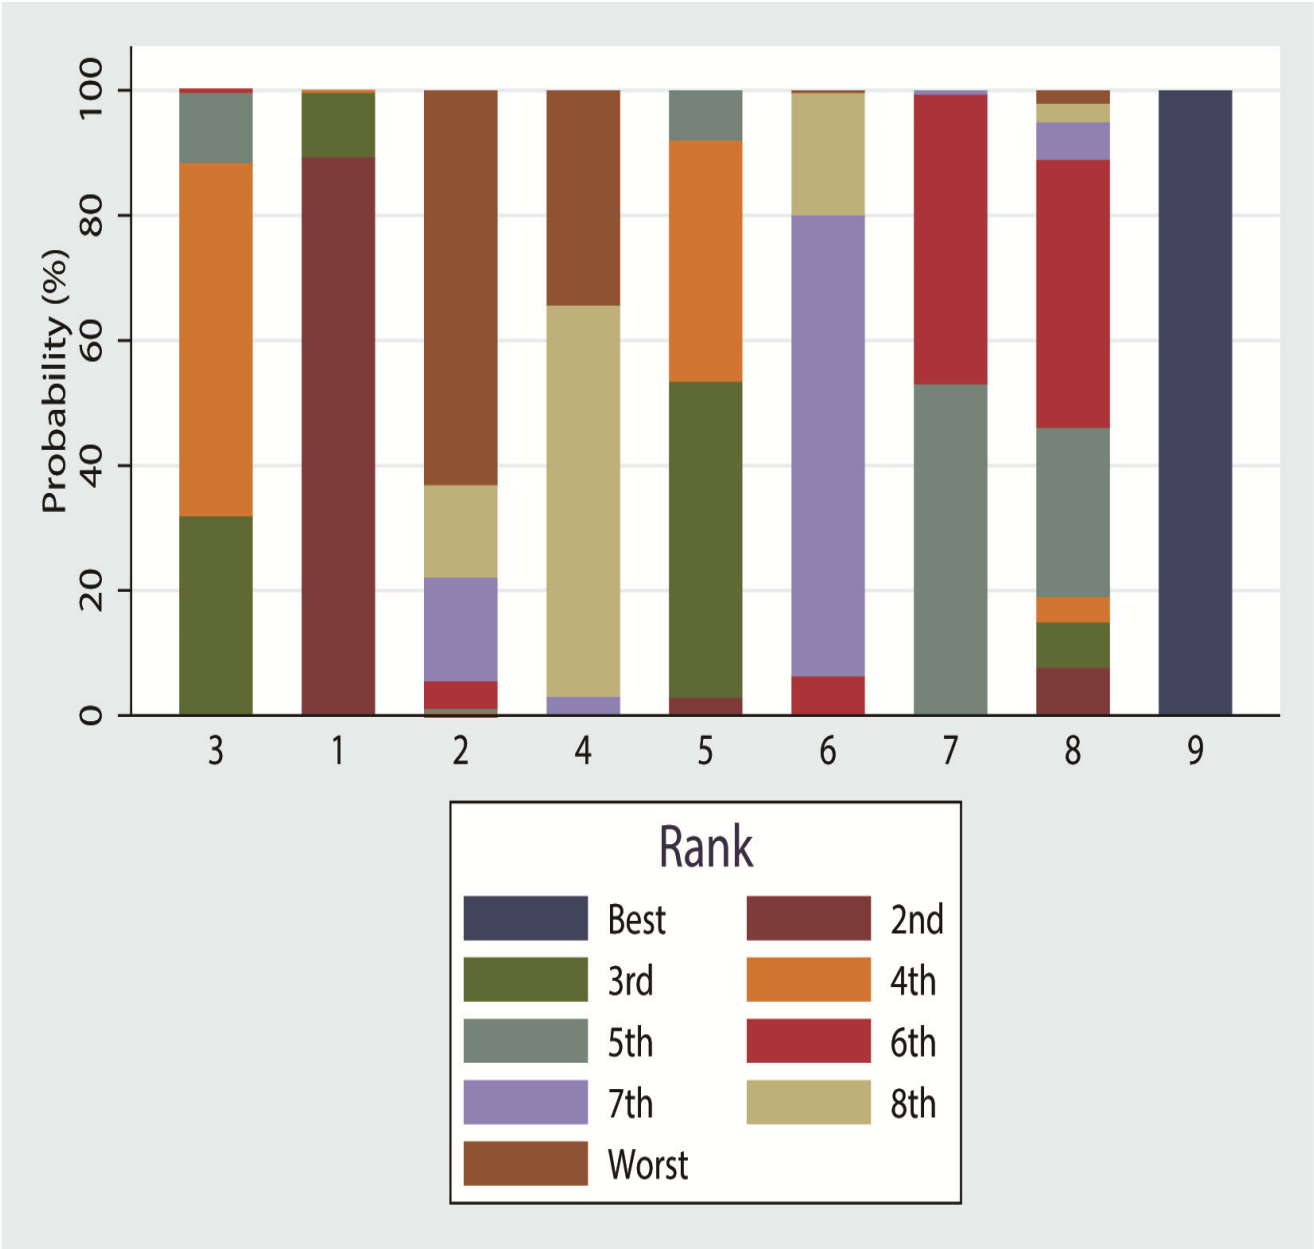

498

C: Weight loss

499

Figure S5: The contribution plots of included studies

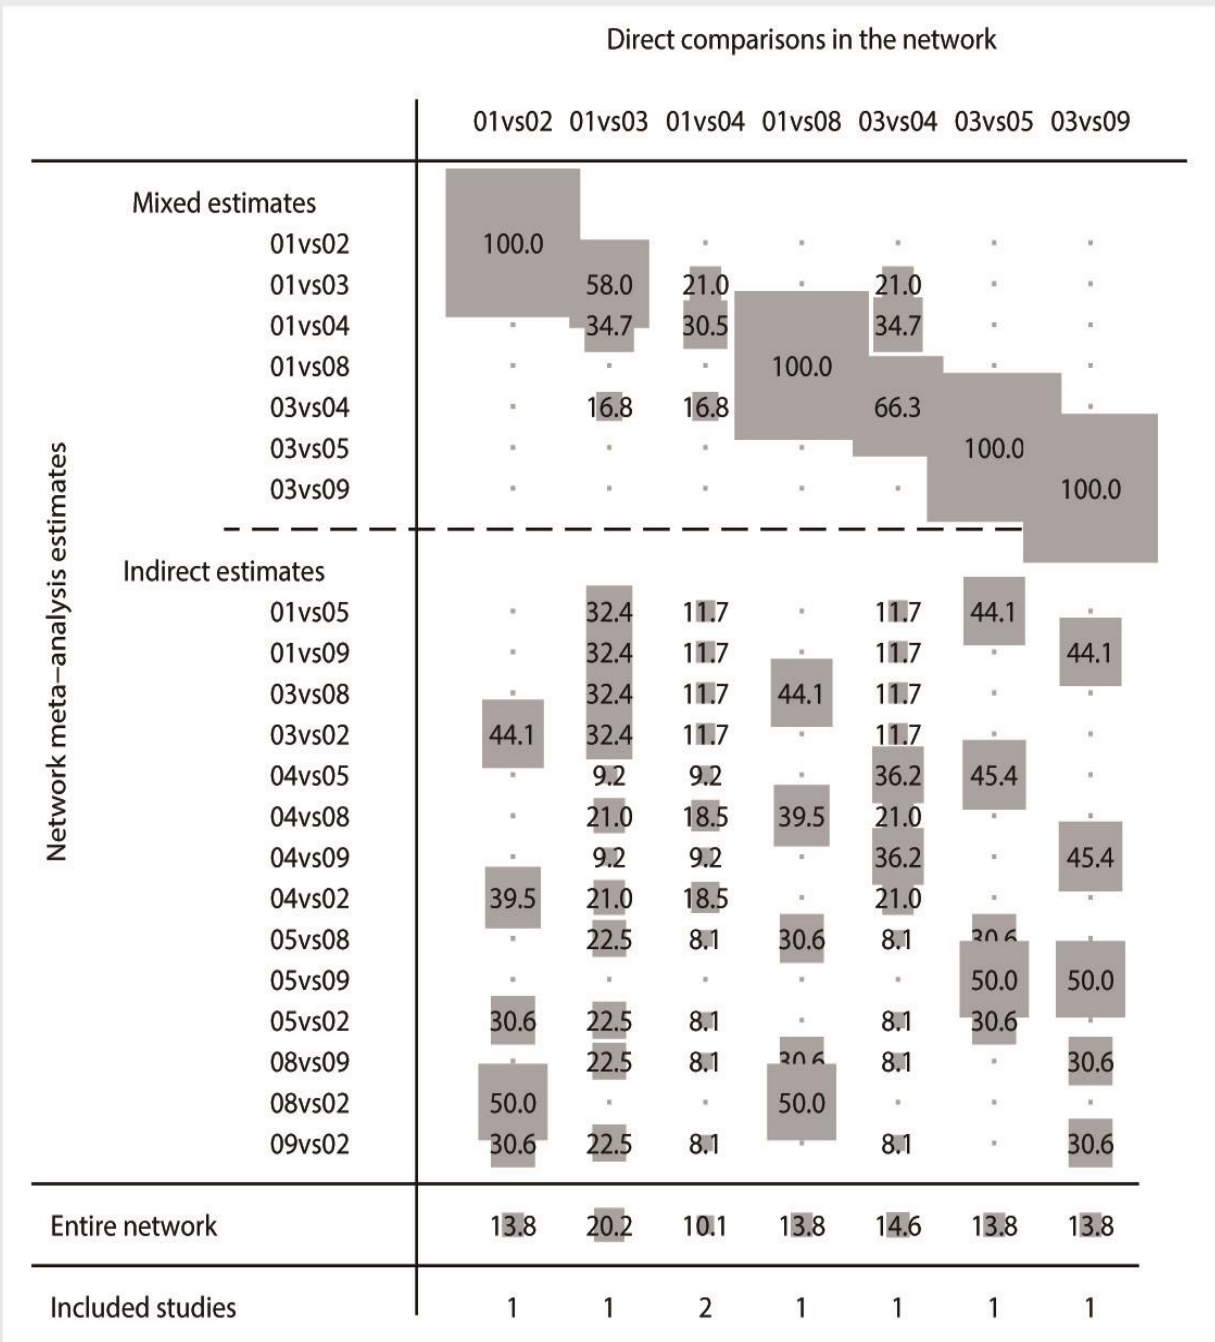

A: FBG



508  
509

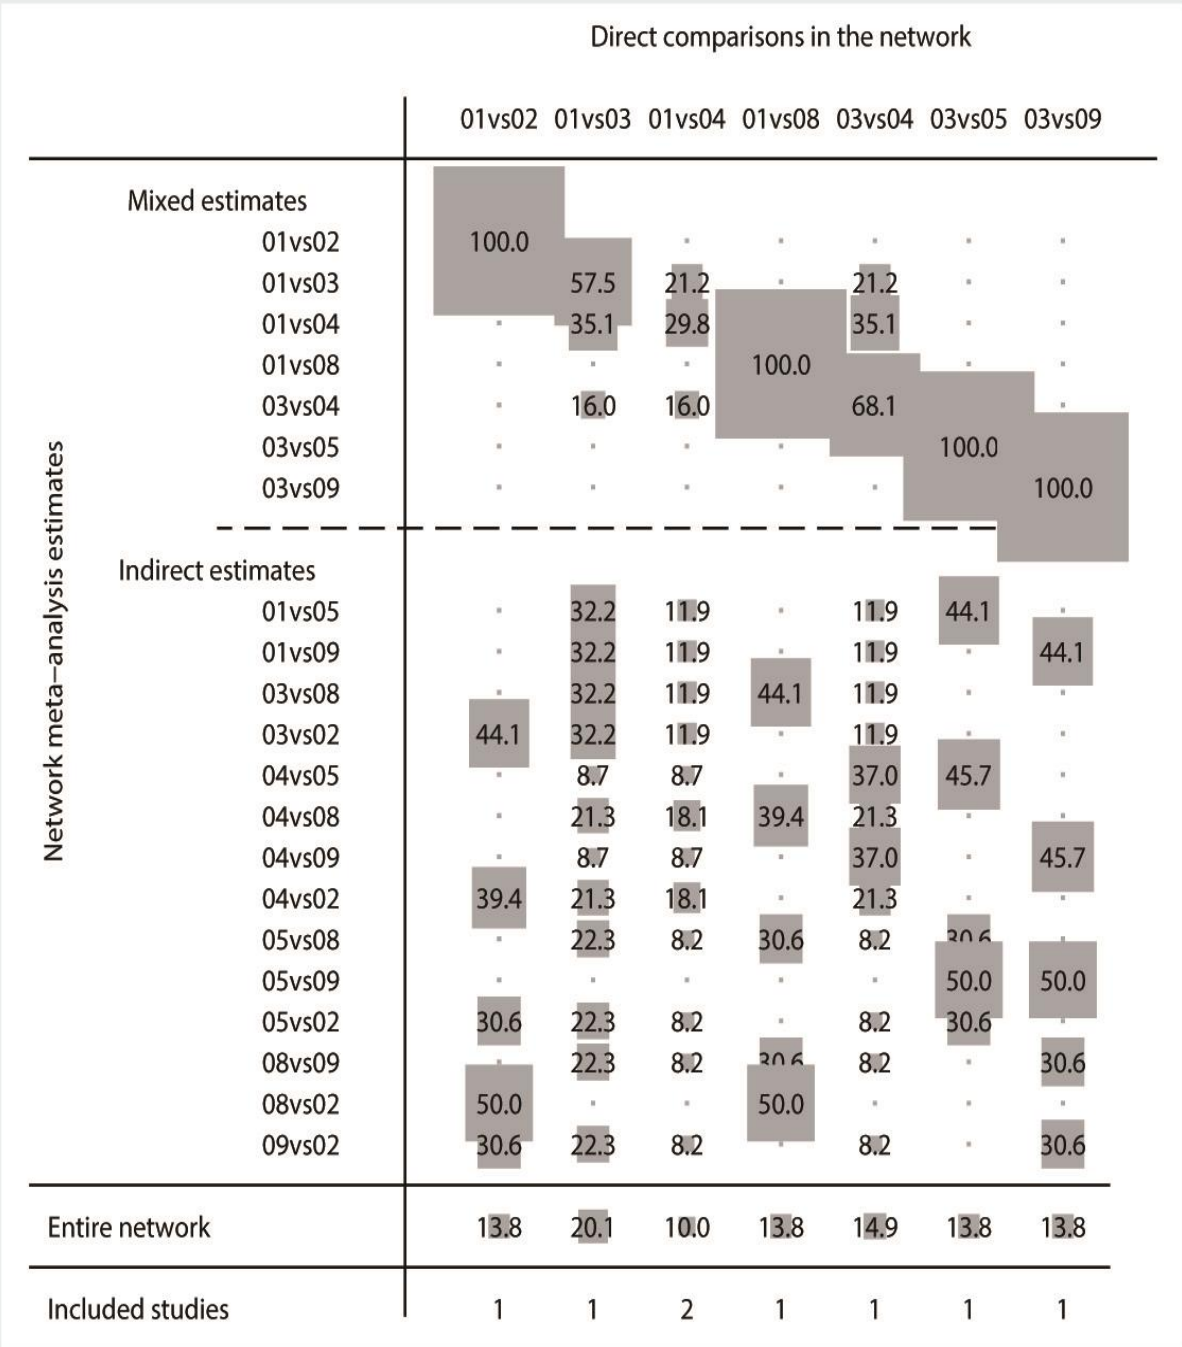

510  
511  
512  
513  
514  
515

B: HbA1c

516

517

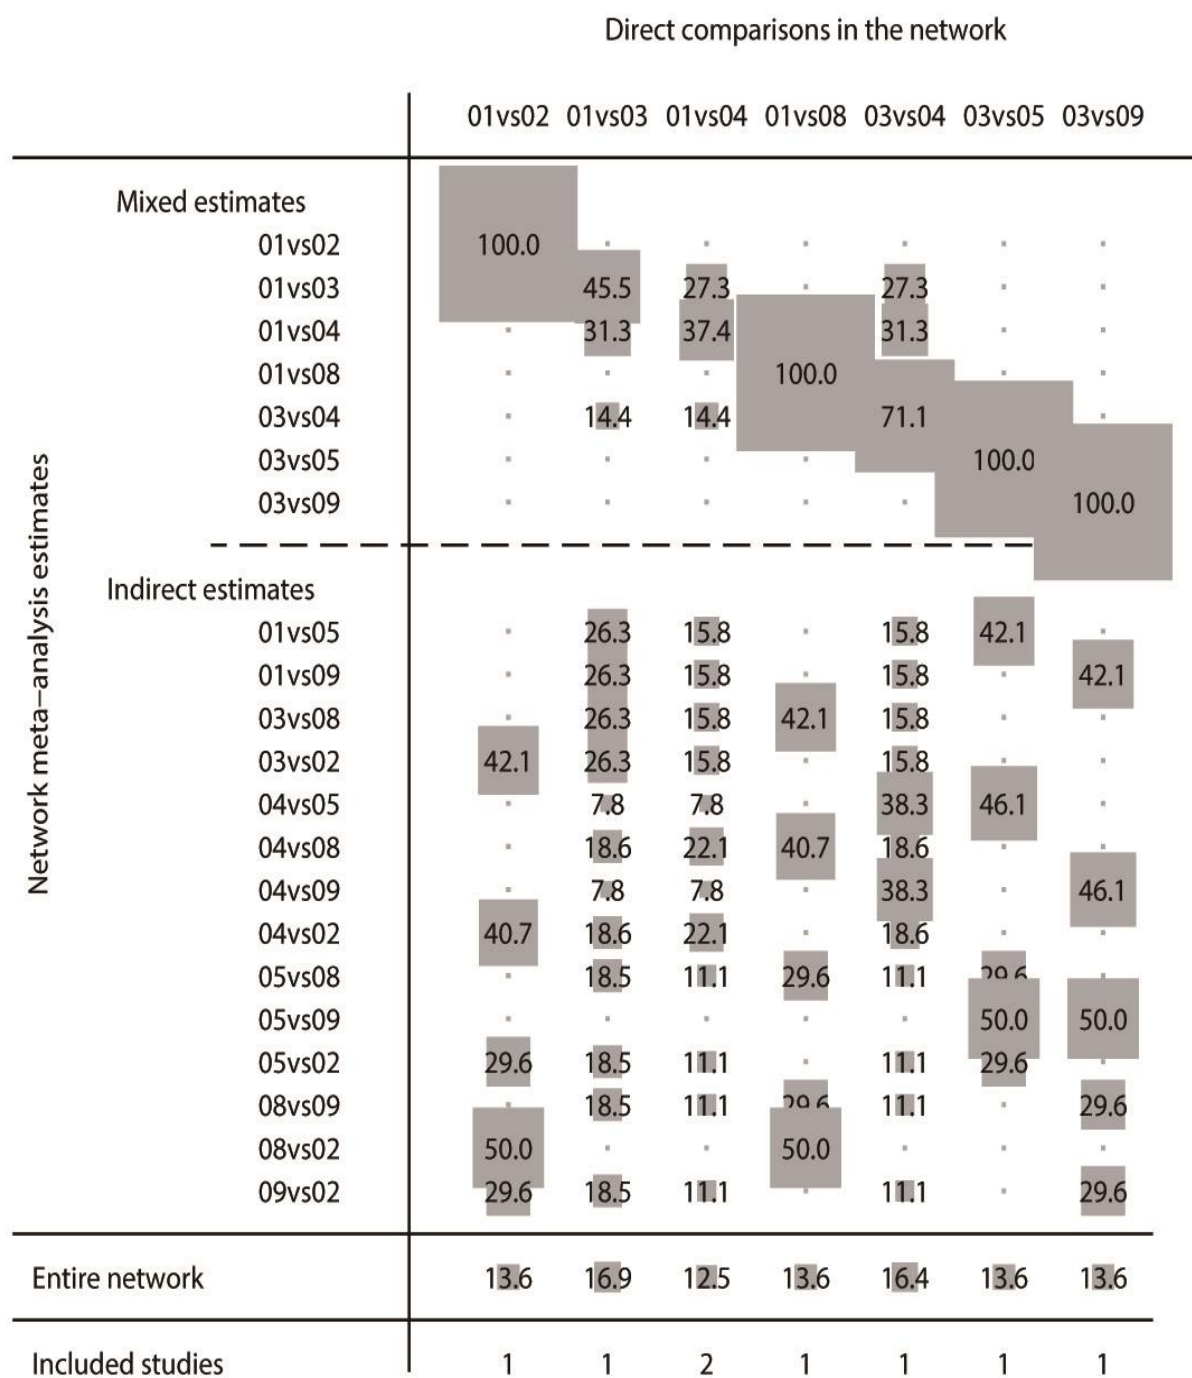

518

C: HOMA- $\beta$ 

519

520

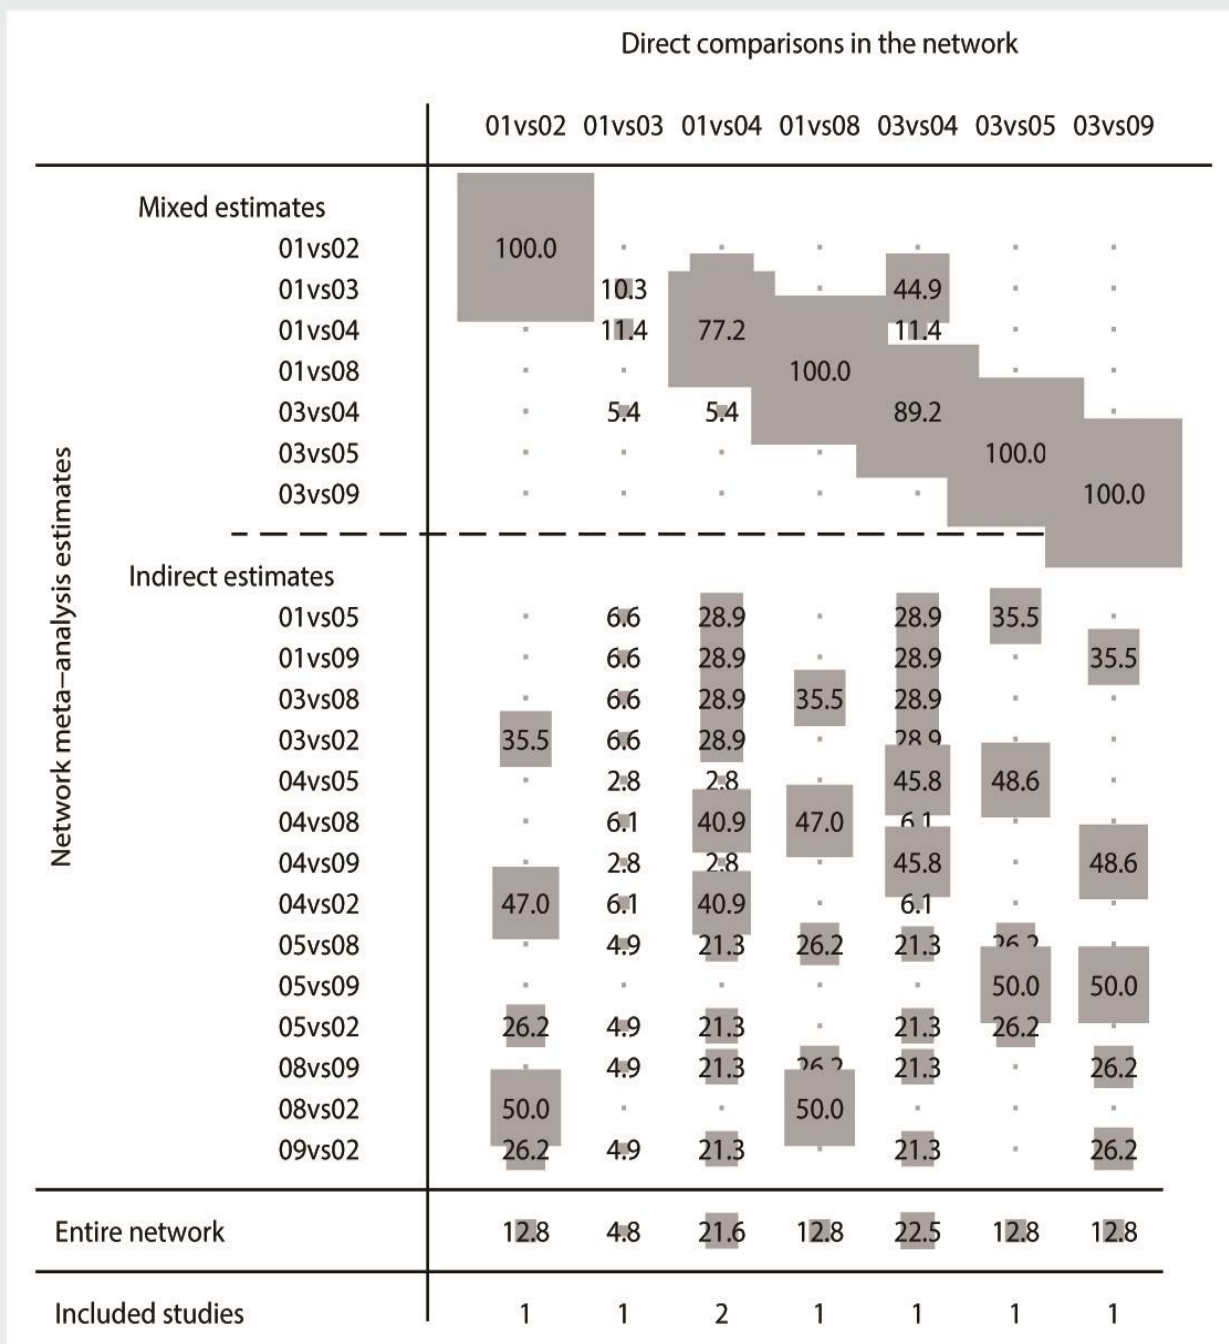

## D: Weight loss

1: EXBID; 2: GLI; 3: EXQW; 4: Insulin; 5: MET; 6: PIO; 7: SITA; 8: Placebo; 9: Semaglutide

525 **Figure S6: Node-splitting plots of outcomes**

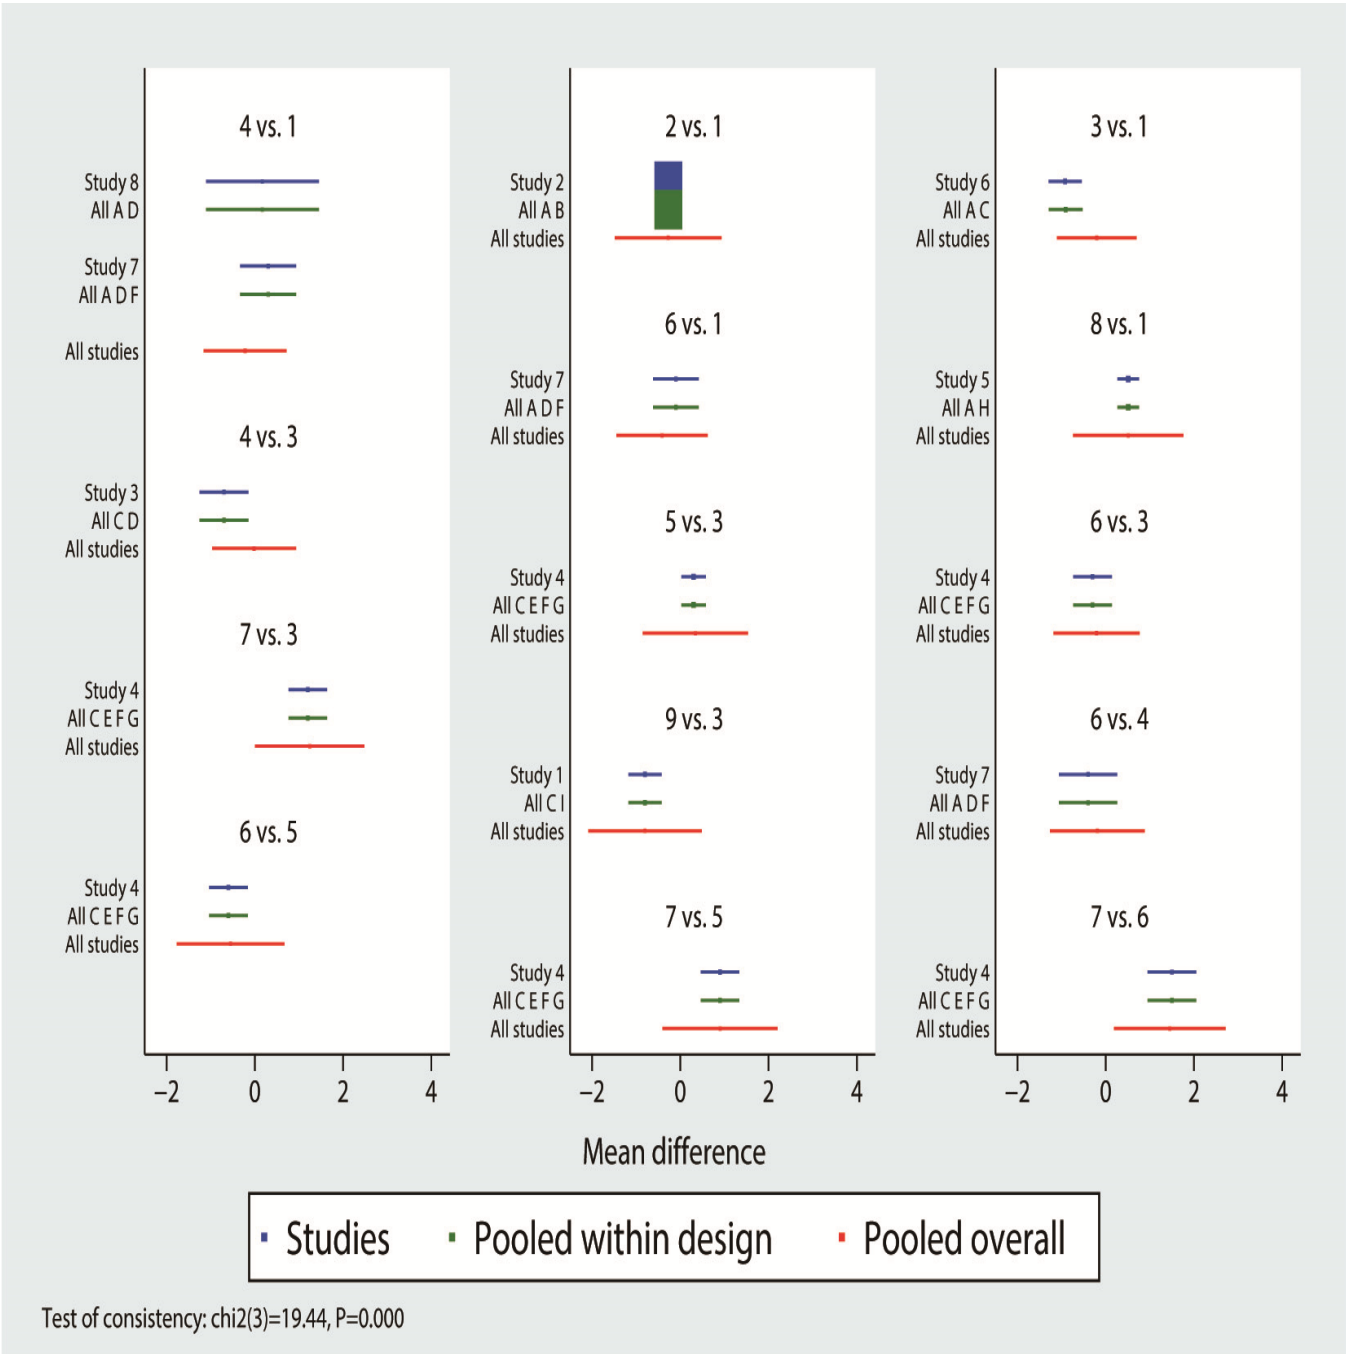

526

A: FBG

527

528

529

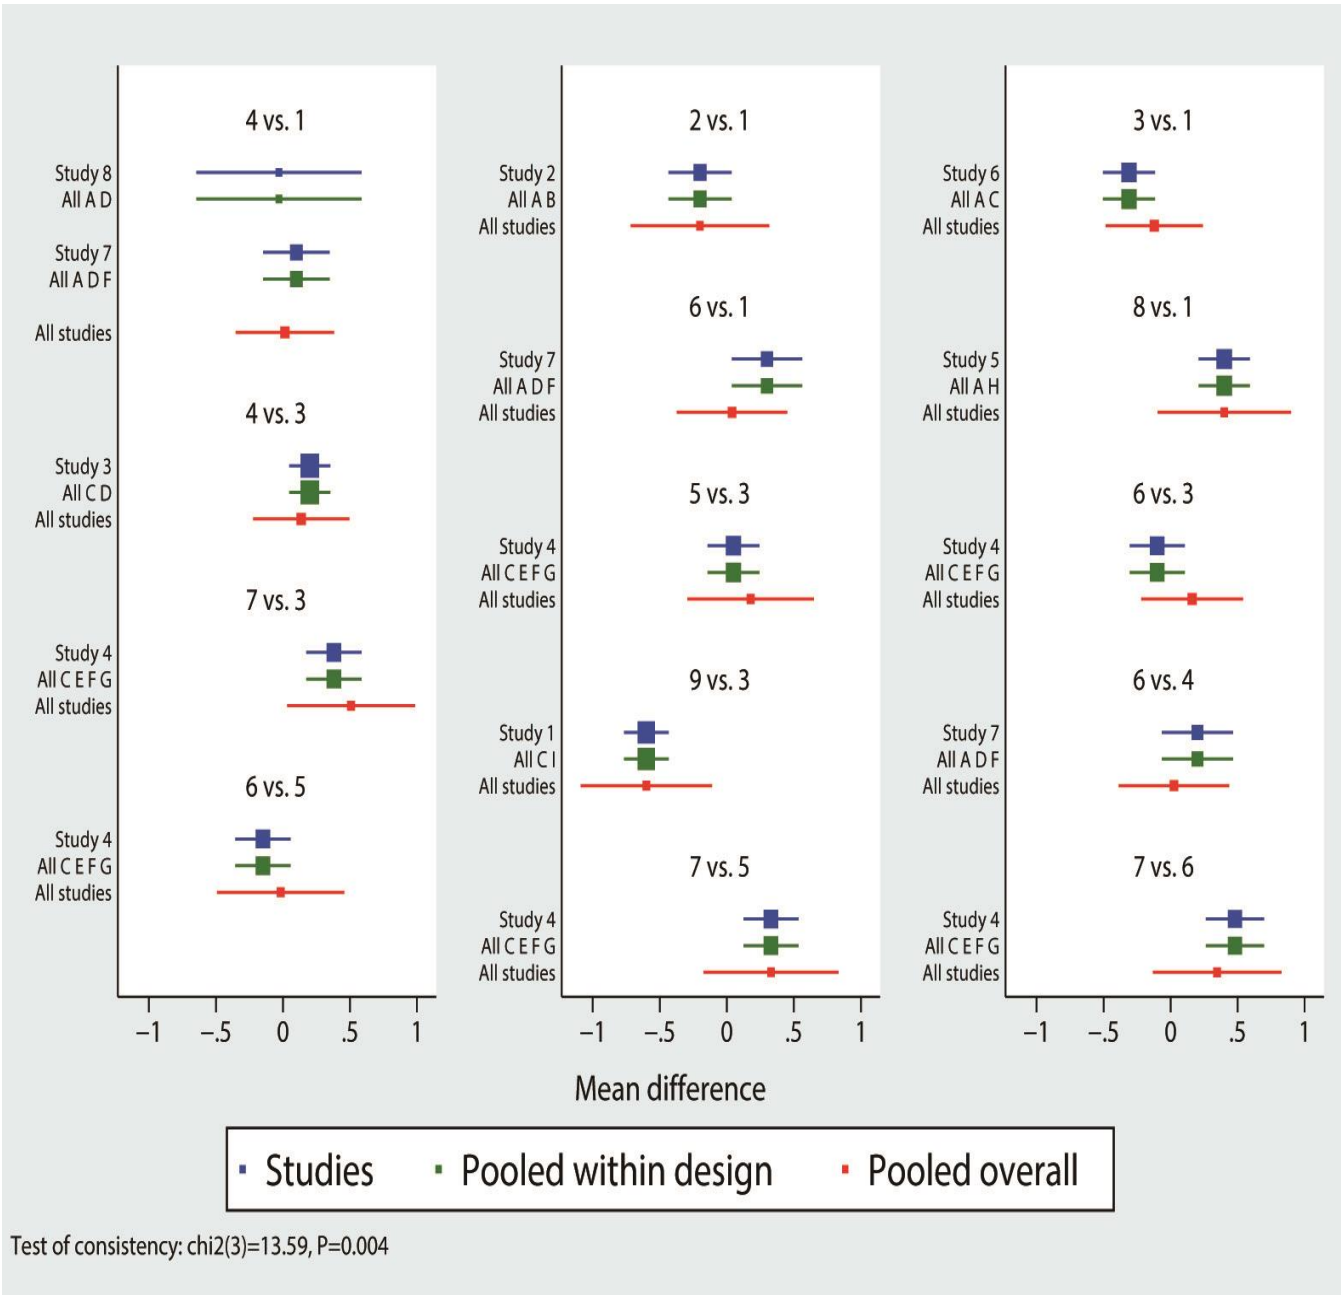

530

B: HbA1c

531

532

533

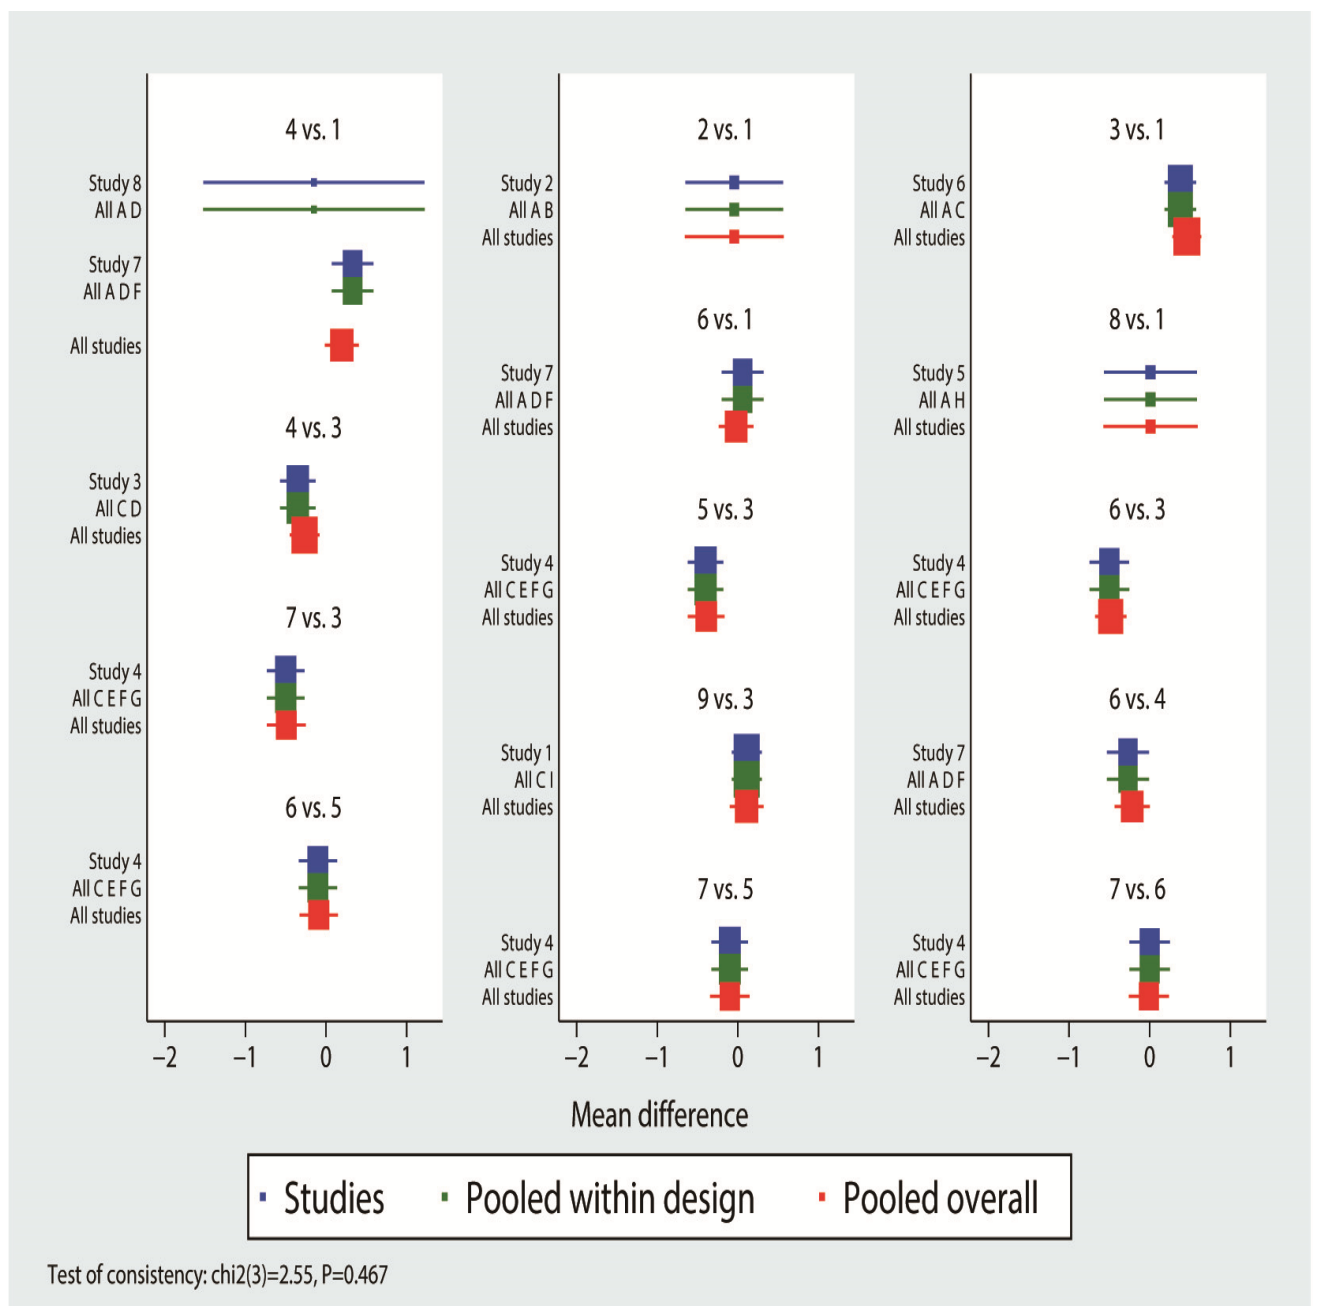

534

C: HOMA- $\beta$

535

536

537

538

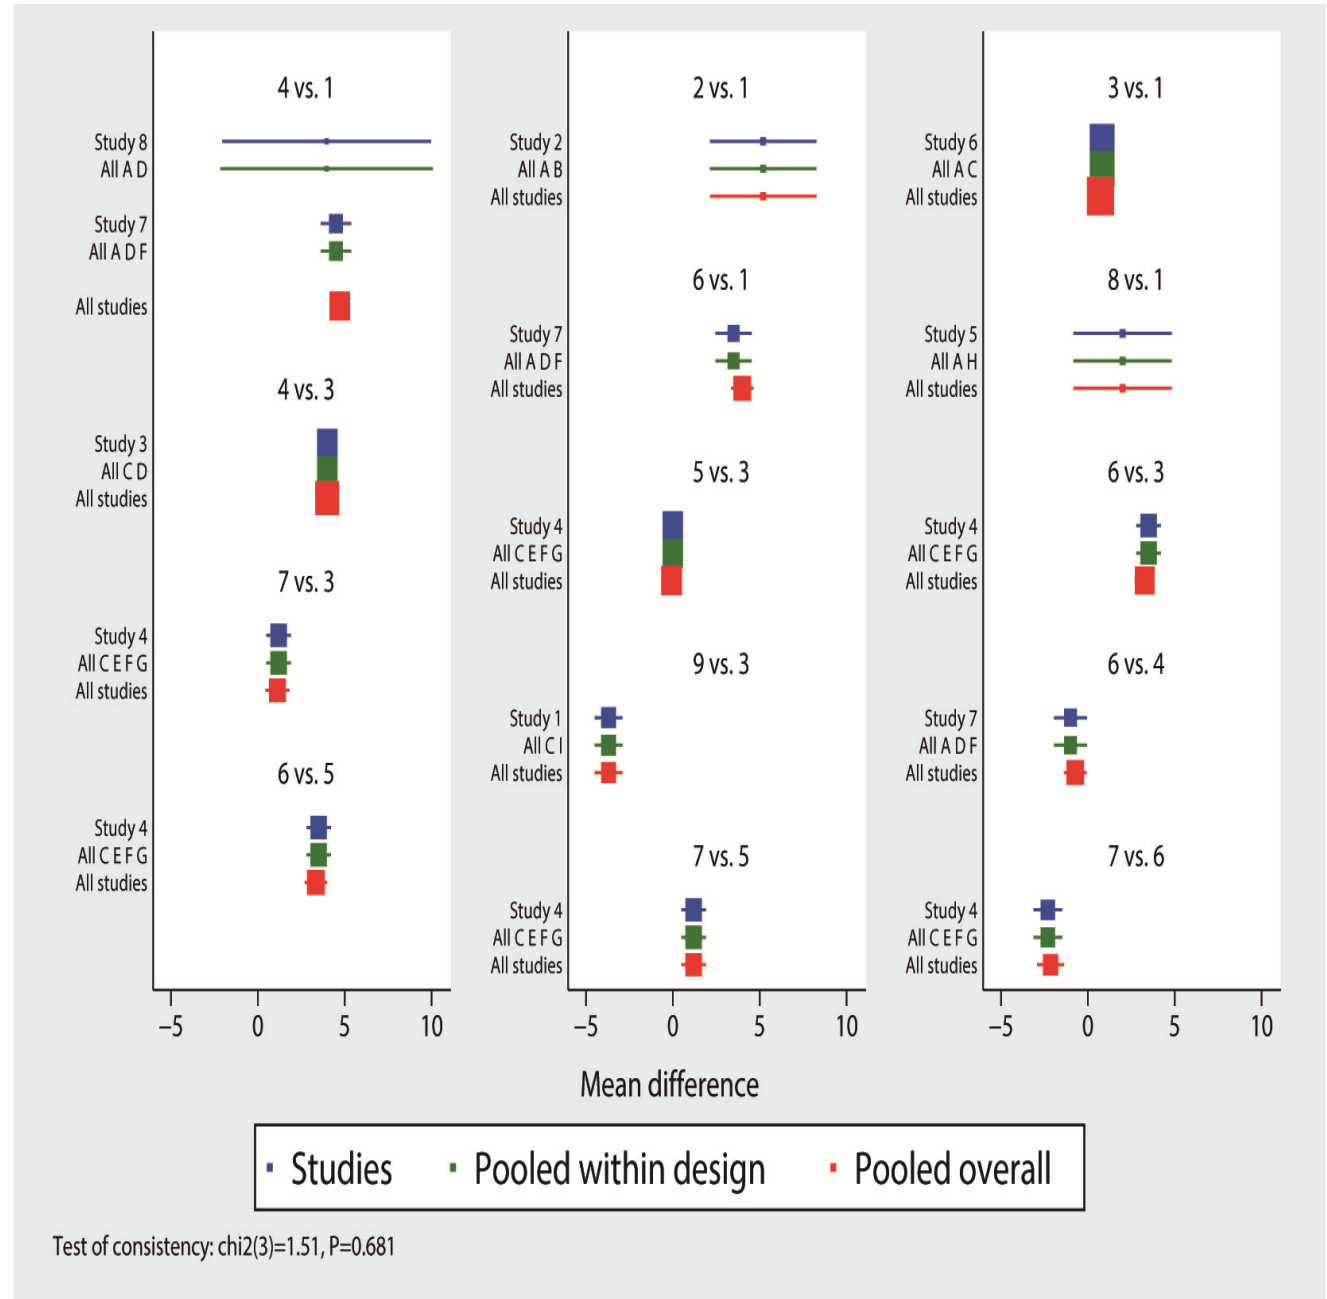

**D: Weight loss**

541 1: EXBID; 2: GLI; 3: EXQW; 4: Insulin; 5: MET; 6: PIO; 7: SITA; 8: Placebo; 9: Semaglutide
